# Supplementary material for: Use, variability, and justification of eligibility criteria for phase II and III clinical trials in acute leukemia
Source: PubMed Central journal article supplement — Haematologica. 2023 Aug 10;109(4):1046–52. doi: 10.3324/haematol.2023.283723 (PMC10985457; doi:10.3324/haematol.2023.283723), 2023-08-10
Supplement: 2023_283723_HANTEL_SUPPL.pdf [file 2023_283723_HANTEL_SUPPL.pdf]

# Use, variability, and justification of eligibility criteria for phase II and III clinical trials in acute leukemia

Andrew Hantel,<sup>1,2,3</sup> Marlise R. Luskin,<sup>3</sup> Irum Khan,<sup>4</sup> Elizabeth Warner,<sup>2</sup> Anand A. Patel,<sup>5</sup> Thomas P. Walsh,<sup>1</sup> Daniel J. DeAngelo,<sup>3</sup> Christopher S. Lathan<sup>1,6</sup> and Gregory A. Abel<sup>1,2,3</sup>

<sup>1</sup>Division of Population Sciences, Dana-Farber Cancer Institute, Boston, MA; <sup>2</sup>Center for Bioethics, Harvard Medical School, Boston, MA; <sup>3</sup>Division of Hematologic Malignancies, Dana-Farber Cancer Institute, Boston, MA; <sup>4</sup>Division of Hematology/Oncology, Department of Medicine, Robert H. Lurie Comprehensive Cancer Center, Northwestern University, Chicago, IL; <sup>5</sup>Section of Hematology-Oncology, Department of Medicine, The University of Chicago, Chicago, IL and <sup>6</sup>Lowe Center for Thoracic Oncology, Dana-Farber Cancer Institute, Boston, MA, USA

**Correspondence:** A. Hantel  
[andrew\\_hantel@dfci.harvard.edu](mailto:andrew_hantel@dfci.harvard.edu)

**Received:** June 13, 2023.

**Accepted:** August 4, 2023.

**Early view:** August 10, 2023.

<https://doi.org/10.3324/haematol.2023.283723>

©2024 Ferrata Storti Foundation

Published under a CC BY-NC license

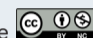

## **Supplemental Appendix**

### **Supplemental Methods**

#### **ClinicalTrials.gov Search Terms:**

Condition or Disease: Acute Myeloid Leukemia OR Acute Lymphoblastic Leukemia

Study Type: Interventional Studies (Clinical Trials)

Age: Adults (18-64) and/or Older Adults (65+)

Phase: Phase 2, Phase 3

Start Dates: 1/1/2010-12/31/2019

#### **Eligibility Criteria Selection and Coding:**

Verbatim criteria were abstracted according to this list, and criteria without pre-specified variables were iteratively included when used by at least three trials. Numerical criteria were transformed to a common unit when possible, with laboratory value parameters at Dana-Farber Cancer Institute used to define normal limits, as needed. Broad or blanket criteria (e.g., “adequate organ function”) were not counted as specific exclusions. A single set of criteria were created for trials with multiple cohorts to maintain a constant unit of analysis and as this set of criteria would reflect the entire population able to participate in the trial.

#### **Drug Safety Data Selection and Coding:**

Drugs were identified by their labeling as “Interventions” in the ClinicalTrials.gov study listing. For drugs FDA-approved at the time of study initiation, the FDA labels was

reviewed for dosing, pharmacology, and safety data; Lexicomp and clinical trials cited were reviewed if the necessary data were not listed in the label.<sup>9</sup> For drugs not FDA-approved at the time of study initiation, the study protocol listed on ClinicalTrials.gov and publication(s) listed in the protocol associated with previously conducted investigational studies were reviewed for safety data. PubMed.gov was also queried using the investigational agent name(s), as listed on ClinicalTrials.gov, to identify study protocols and study results; the first 20 search results (sorted by “Best Match”) were reviewed to identify additional safety data. Sources were documented and binary safety signals were assigned if review identified Common Terminology Criteria for Adverse Events (CTCAE) any grade  $\geq 3$  toxicity related to the eligibility criteria of interest, and/or any grade toxicity in  $\geq 10\%$  of participants, and/or renal/hepatic elimination  $\geq 10\%$ .<sup>10,11</sup> Drugs associated with viral reactivation and moderate/major substrates of metabolic processes relevant to antiviral medications (e.g., CYP, p-GP, UGT) were catalogued.<sup>12</sup> Drug safety signals and limits were then assigned to trials according to the therapies tested; when multiple limits for the same criterion were present, the most conservative value was used.

**Supplemental Table 1.** Clinical Trial Enrollment Criteria Variables and Codes

| Category              | Variable                                                     | Response Type | Response Options                               | Abstractor Instructions                                                                                                                                                               |
|-----------------------|--------------------------------------------------------------|---------------|------------------------------------------------|---------------------------------------------------------------------------------------------------------------------------------------------------------------------------------------|
| Trial Characteristics | Year                                                         | Numerical     | Number                                         | Year of study start date.                                                                                                                                                             |
|                       | Phase II                                                     | Binary        | Yes, No                                        | "Yes" if there was a Phase II component.                                                                                                                                              |
|                       | Phase III                                                    | Binary        | Yes, No                                        | "Yes" if there was a Phase III component.                                                                                                                                             |
|                       | Number of Participants                                       | Numerical     | Number                                         | Number of study subjects listed.                                                                                                                                                      |
|                       | Academic Investigator/Institution Sponsor                    | Binary        | Yes, No                                        | "Yes" if there was an academic investigator/institution listed as study sponsor.                                                                                                      |
| Sponsor               | NIH Sponsor                                                  | Binary        | Yes, No                                        | "Yes" if the NIH was listed as study sponsor.                                                                                                                                         |
|                       | Industry Sponsor                                             | Binary        | Yes, No                                        | "Yes" if a pharmaceutical company or other medical industry company listed as study sponsor.                                                                                          |
|                       | Randomization                                                | Binary        | Yes, No                                        | "Yes" if participants were randomized to a treatment arm.                                                                                                                             |
| Demographics          | Older Adult Age Demarcation                                  | Numerical     | Number                                         | Age (in years) listed to demarcate older from younger adults, to restrict the trial to older adults, or to restrict from the inclusion of older adults. Leave blank if not mentioned. |
|                       | ECOG Performance Status Limit                                | Numerical     | Number                                         | Upper limit of performance status. Leave blank for trials and/or cohorts that require participants to have poor performance status. Leave blank if not mentioned.                     |
|                       | Life Expectancy                                              | Numerical     | Number                                         | Time (in years) listed denoting the minimum life expectancy an individual should have to be eligible to participate. Leave blank if not mentioned.                                    |
| Comorbidities         | Restriction for Prior Malignancy                             | Binary        | Yes, No                                        | "Yes" if there is a restriction for persons with a prior malignancy diagnosis.                                                                                                        |
|                       | Exception for Prior Malignancy Based on Time Since Remission | Binary        | Yes, No                                        | "Yes" if there is an exception to the prior malignancy restriction based on years in remission from prior malignancy                                                                  |
|                       | Time Since Remission of Prior Malignancy                     | Numerical     | Number                                         | List the number of years required to have passed since documented remission from prior malignancy for the individual to be allowed to participate. Leave blank if not mentioned.      |
|                       | HIV Restriction                                              | Categorical   | Not allowed, Allowed, Allowed with restriction | Note if the trial allows, does not allow, or allows HIV with restriction (e.g., allows controlled but not active HIV). Leave blank if not mentioned.                                  |

|                         |                                          |             |                                                 |                                                                                                                                                                                                                                                           |
|-------------------------|------------------------------------------|-------------|-------------------------------------------------|-----------------------------------------------------------------------------------------------------------------------------------------------------------------------------------------------------------------------------------------------------------|
|                         | Hepatitis B Restriction                  | Categorical | Not allowed, Allowed, Allowed with restriction  | Note if the trial allows, does not allow, or allows Hepatitis B with restriction (e.g., allows controlled but not active infection). Leave blank if not mentioned.                                                                                        |
|                         | Hepatitis C Restriction                  | Categorical | Not allowed, Allowed, Allowed with restriction  | Note if the trial allows, does not allow, or allows Hepatitis B with restriction (e.g., allows controlled but not active infection). Leave blank if not mentioned.                                                                                        |
| Organ Function          | Left Ventricular Ejection Fraction Limit | Numerical   | Number                                          | Lower percentage limit of ejection fraction. Leave blank for trials and/or cohorts that require participants to have decreased ejection fraction. Leave blank if not mentioned.                                                                           |
|                         | QTc                                      | Numerical   | Number                                          | Upper limit of the QTc interval. Leave blank if not mentioned.                                                                                                                                                                                            |
|                         | Renal Function Limit                     | Numerical   | Number                                          | Upper limit of creatinine or lower limit of CrCl or eGFR (or other measure). List formula used for calculation if stated. Leave blank for trials and/or cohorts that require participants to have decreased renal function. Leave blank if not mentioned. |
|                         | Bilirubin Limit                          | Numerical   | Number                                          | Upper limit of bilirubin with unit of measure. Leave blank for trials and/or cohorts that require participants to have decreased liver function. Leave blank if not mentioned.                                                                            |
|                         | Gilbert's Exception                      | Binary      | Yes, No                                         | "Yes" if there is an exception to the bilirubin limit for suspected or diagnosed Gilbert's disease. Leave blank if no bilirubin limit.                                                                                                                    |
|                         | AST/ALT Limit                            | Numerical   | Number                                          | Upper limit of AST/ALT with units of measure (list both values if they are different). Leave blank for trials and/or cohorts that require participants to have decreased liver function. Leave blank if not mentioned.                                    |
|                         | Disease Exception                        | Binary      | Yes, No                                         | "Yes" if there is an exception to the bilirubin and/or AST/ALT limit for suspected elevation due to leukemic involvement. Leave blank if no liver function limits mentioned.                                                                              |
| Disease Characteristics | Disease Status                           | Binary      | Active, Remission                               | Note if the trial is for patients with active disease or in remission.                                                                                                                                                                                    |
|                         | CNS Disease                              | Categorical | Allowed, Not Allowed, Allowed with Restrictions | Note if the trial allows, does not allow, or allows with restriction (e.g., allows history of CNS disease but not active disease). Leave blank if not mentioned.                                                                                          |
|                         | WBC Count Upper Limit                    | Numerical   | Number                                          | List the upper limit of the WBC count allowed in 10 <sup>9</sup> /L. Leave blank if not mentioned.                                                                                                                                                        |

|                           |                                              |           |         |                                                                                                   |
|---------------------------|----------------------------------------------|-----------|---------|---------------------------------------------------------------------------------------------------|
| Treatment Characteristics | Hydrea Cyto-reduction                        | Binary    | Yes, No | "Yes" if cyto-reduction with hydrea is allowed.                                                   |
|                           | Leukopheresis Cyto-reduction                 | Binary    | Yes, No | "Yes" if cyto-reduction with leukopheresis is allowed.                                            |
|                           | Cytarabine Cyto-reduction                    | Binary    | Yes, No | "Yes" if cyto-reduction with cytarabine is allowed.                                               |
|                           | Prior Treatment Allowed                      | Binary    | Yes, No | "Yes" if prior treatments for acute myeloid leukemia are allowed.                                 |
|                           | Prior Treatment Wash Out Period (days)       | Numerical | Number  | List the required washout period after prior anti-cancer therapies, if listed in days.            |
|                           | Prior Treatment Wash Out Period (half-lives) | Numerical | Number  | List the required washout period after prior anti-cancer therapies, if listed in drug half-lives. |

NIH: National Institutes of Health; ECOG: Eastern Cooperative Oncology Group; HIV: human immunodeficiency virus; QTc: corrected QT interval; AST/ALT: Aspartate transaminase / alanine aminotransferase; CNS: central nervous system; WBC: white blood cell.

**Supplemental Table 2.** Drug Safety Review Variables and Codes

| Category | Variable                    | Response Type | Response Options                                                                                                                | Abstractor Instructions                                                                                                                                         |
|----------|-----------------------------|---------------|---------------------------------------------------------------------------------------------------------------------------------|-----------------------------------------------------------------------------------------------------------------------------------------------------------------|
| Drug     | Investigational             | Binary        | Yes, No                                                                                                                         | "Yes" if the drug did not have an FDA approval at the study start date.                                                                                         |
|          | Class                       | Categorical   | Anthracycline, Antimetabolite, Purine analogue, etc.                                                                            | List the drug class. If there is no class identified, list the mechanism(s) of action.                                                                          |
|          | Sources Reviewed            | Categorical   | Non-investigational: FDA labels, Lexicomp, and registration trials.                                                             | List the sources reviewed from which the data entered was obtained.                                                                                             |
|          |                             |               | Investigational: phase 0/II study protocol, phase 0 and I study result, additional study protocol or results from other setting | List the sources reviewed from which the data entered was obtained.                                                                                             |
|          | Source URLs                 | Categorical   | URL                                                                                                                             | List the URLs for the sources identified above.                                                                                                                 |
| Renal    | Elimination                 | Binary        | Yes, No                                                                                                                         | "Yes" if drug metabolism and/or excretion is listed as $\geq 10\%$ renal/urinary.                                                                               |
|          | Toxicity                    | Binary        | Yes, No                                                                                                                         | "Yes" if the data source lists Common Terminology Criteria for Adverse Events grade $\geq 3$ toxicity and/or any grade toxicity in $\geq 10\%$ of participants. |
|          | Limit Listed                | Binary        | Yes, No                                                                                                                         | "Yes" if there is a suggested limit to renal function listed.                                                                                                   |
|          | Limit Value                 | Numerical     | Number                                                                                                                          | List the renal function limit listed.                                                                                                                           |
|          | Limit Value Units           | Categorical   | mg/dl, ml/min, ml/min/1.73m <sup>2</sup>                                                                                        | List the units used for the limit value.                                                                                                                        |
| Hepatic  | Elimination                 | Binary        | Yes, No                                                                                                                         | "Yes" if drug metabolism and/or excretion is listed as $\geq 10\%$ hepatic/biliary.                                                                             |
|          | Toxicity                    | Binary        | Yes, No                                                                                                                         | "Yes" if the data source lists Common Terminology Criteria for Adverse Events grade $\geq 3$ toxicity and/or any grade toxicity in $\geq 10\%$ of participants. |
|          | Bilirubin Limit Listed      | Binary        | Yes, No                                                                                                                         | "Yes" if there is a suggested limit to the bilirubin listed.                                                                                                    |
|          | Bilirubin Limit Value       | Numerical     | Number                                                                                                                          | List the bilirubin limit listed.                                                                                                                                |
|          | Bilirubin Limit Value Units | Categorical   | mg/dl, ULN                                                                                                                      | List the units used for the limit value.                                                                                                                        |
|          | AST/ALT Limit Listed        | Binary        | Yes, No                                                                                                                         | "Yes" if there is a suggested limit to AST/ALT listed. If there are separate limits, list separately.                                                           |
|          | AST/ALT Limit Value         | Numerical     | Number                                                                                                                          | List the AST/ALT limit listed. If there are separate limits, list separately.                                                                                   |

|                                            |                                                                       |             |                      |                                                                                                |
|--------------------------------------------|-----------------------------------------------------------------------|-------------|----------------------|------------------------------------------------------------------------------------------------|
|                                            | AST/ALT Limit Value Units                                             | Categorical | mg/dl, ULN           | List the units used for the limit value. If there are separate limits, list separately.        |
| Cardiac                                    | QTc Prolongation                                                      | Binary      | Yes, No              | "Yes" if QTc prolongation risk is listed as associated with the drug.                          |
|                                            | QTc Limit Listed                                                      | Binary      | Yes, No              | "Yes" if there is a suggested limit to the QTc listed.                                         |
|                                            | QTc Limit Value                                                       | Numerical   | Number               | List the QTc limit listed.                                                                     |
|                                            | QTc Limit Value Units                                                 | Categorical | ms                   | List the units used for the limit value.                                                       |
|                                            | Heart Failure or Cardiomyopathy                                       | Binary      | Yes, No              | "Yes" if heart failure and/or cardiomyopathy risk is listed as associated with the drug.       |
|                                            | Left Ventricular Ejection Fraction (LVEF) Limit Listed                | Binary      | Yes, No              | "Yes" if there is a suggested limit to the LVEF listed.                                        |
|                                            | Left Ventricular Ejection Fraction Limit Value                        | Numerical   | Number               | List the LVEF limit listed.                                                                    |
|                                            | Left Ventricular Ejection Fraction Limit Value Units                  | Categorical | %                    | List the units used for the limit value.                                                       |
| Potential Antiviral Drug-Drug Interactions | Moderate or Major CYP3A4, CYP2B6, CYP2C19, CYP2C9 or CYP1A2 Substrate | Binary      | Yes, No              | "Yes" if the drug is a moderate or major substrate of at least one of the listed CYPs.         |
|                                            | Moderate or Major CYP Substrates                                      | Categorical | CYP3A4, CYP2B6, etc. | List the CYPs for which it is a moderate or major substrate.                                   |
|                                            | p-glycoprotein Substrate                                              | Binary      | Yes, No              | "Yes" if the drug is a moderate or major substrate of p-GP.                                    |
|                                            | UGT Family Substrate                                                  | Binary      | Yes, No              | "Yes" if the drug is a moderate or major substrate of a UGT.                                   |
|                                            | Other Substrate                                                       | Binary      | Yes, No              | "Yes" if the drug is a moderate or major substrate of another protein/enzyme not listed above. |
|                                            | Other Substrate List                                                  | Categorical | OAT1, OCT1, etc.     | List the other protein/enzyme for which it is a moderate or major substrate.                   |
| Viral Reactivation                         | HIV                                                                   | Binary      | Yes, No              | "Yes" if HIV reactivation risk is listed as associated with the drug.                          |
|                                            | Hepatitis B                                                           | Binary      | Yes, No              | "Yes" if Hepatitis B reactivation risk is listed as associated with the drug.                  |
|                                            | Hepatitis C                                                           | Binary      | Yes, No              | "Yes" if Hepatitis C reactivation risk is listed as associated with the drug.                  |



**Supplemental Table 3. Drugs Included in the Analysis**

|                         |                                         |                                   |                        |
|-------------------------|-----------------------------------------|-----------------------------------|------------------------|
| 33A                     | Crenolanib                              | Imatinib                          | CB-839                 |
| 9-ING-41                | CX-01                                   | IMGN632                           | Pevonedistat           |
| ABL001                  | Cyclophosphamide                        | INCB053914                        | Pinometostat           |
| Acalabrutinib           | Cytarabine                              | INCB054329                        | Plerixafor             |
| ADI-PEG 20              | Daratumumab                             | INCB059872                        | Ponatinib              |
| Alemtuzumab             | Dasatinib                               | Inotuzumab ozogamicin             | Pracinostat            |
| Alisertib               | Daunorubicin                            | digoxin                           | PRI-724                |
| All-trans retinoic acid | DC AML Vaccine                          | Iomab-B                           | Quizartinib            |
| Alvocidib               | DCLL9718S                               | Ipilimumab                        | Rabbit ATG             |
| Anti-Thymocyte Globulin | Decitabine                              | Irinotecan                        | Tosedostat             |
| APR-246                 | Deferasirox                             | Ivosidenib                        | Rigosertib             |
| Ascorbic acid           | Dexrazoxane                             | Ixazomib                          | Rituximab              |
| ASLAN003                | DFP-10917                               | JZP-458                           | Ruxolitinib            |
| Asparaginase            | Doxil                                   | KRT-232                           | Samalizumab            |
| ASTX727                 | Doxorubicin                             | Lenalidomide                      | Sapacitabine           |
| Atezolizumab            | DT388IL3                                | Lintuzumab-Ac225                  | Sargramostim           |
| Azacitidine             | Durvalumab                              | Lomustine                         | Selinexor              |
| AZD1775                 | E6202                                   | Lorvotuzumab Mertansine (IMGN901) | Sirolimus              |
| Bemcentinib             | Eltrombopag                             | LY3039478                         | SL-401                 |
| Bendamustine            | Enasidenib                              | MEK 162                           | SNDX-5613              |
| Bexarotene              | Entinostat                              | Melphalan                         | Sorafenib              |
| BI 836858               | Entospletinib                           | Mercaptopurine                    | Sunitinib              |
| Birinapant              | Erlotinib                               | Methotrexate                      | SY-1425 (tamibarotene) |
| BL-8040                 | Erwinia asparaginase                    | MGTA-456                          | Tacrolimus             |
| Blinatumomab            | Erwinia asparaginase (recombinant)-rywn | Midostaurin                       | Talacotuzumab          |
| BMS-936564              | Etoposide                               | N-803                             | Talazoparib            |

|                                       |                       |                       |                       |
|---------------------------------------|-----------------------|-----------------------|-----------------------|
| Bortezomib                            | Fludarabine           | Mitoxantrone          | Thioguanine           |
| Bosutinib                             | Galinpepimut-S        | Mycophenolate Mofetil | Thiotepa              |
| BP1001                                | Gemcitabine           | Nelarabine            | Tipifarnib            |
| CC-486                                | Gemtuzumab ozogamicin | Nilotinib             | Topotecan             |
| Brentuximab Vedotin                   | Gilteritinib          | Nivolumab             | Trametinib            |
| BST-236                               | Glasdegib             | NLA-101               | Veliparib             |
| Busulfan                              | GMI-1271              | Ofatumumab            | Venetoclax            |
| BVD-523                               | GSK2141795            | Omacetaxine           | Vincristine           |
| Calaspargase Pegol-mknl               | Guadecitabine         | Onvansertib           | Volasertib            |
| Carboplatin                           | PF-04449913           | Paclitaxel            | Vorinostat            |
| Cholecalciferol                       | Ibrutinib             | Pacritinib            | Peginterferon Alfa-2a |
| Cladribine                            | Idarubicin            | Palcociclib           | Vosaroxin             |
| Clofarabine                           | Idasanutlin           | PD-616                | WT1 peptide vaccine   |
| Co-ArgI-PEG modified human arginase I | Idelalisib            | PEG-Asparaginase      |                       |
| CPX-351                               | Ifosfamide            | Pembrolizumab         |                       |

**Supplemental Table 4.** Odds of Phase III eligibility criteria concordance compared to Phase II.

| <b>Criteria</b>      | <b>OR Concordance</b> | <b>p-value</b> | <b>OR 95% CI</b> |
|----------------------|-----------------------|----------------|------------------|
| LVEF Limit           | 0.54                  | 0.06           | 0.28,1.05        |
| QTc Limit            | 0.86                  | 0.63           | 0.45,1.61        |
| Bilirubin Limit      | 0.41                  | 0.01           | 0.21,0.78        |
| AST/ALT Limit        | 0.43                  | 0.01           | 0.23,0.83        |
| Renal Function Limit | 0.53                  | 0.047          | 0.28,0.99        |
| HIV Any Excl         | 0.79                  | 0.46           | 0.41,1.49        |
| Hepatitis B Any Excl | 0.78                  | 0.54           | 0.41,1.47        |
| Hepatitis C Any Excl | 0.85                  | 0.60           | 0.45,1.61        |

LVEF: left ventricular ejection fraction; QTc: corrected QT interval; AST/ALT: Aspartate transaminase / alanine aminotransferase; HIV: human immunodeficiency virus

Supplemental Figure 1. PRISMA Diagram

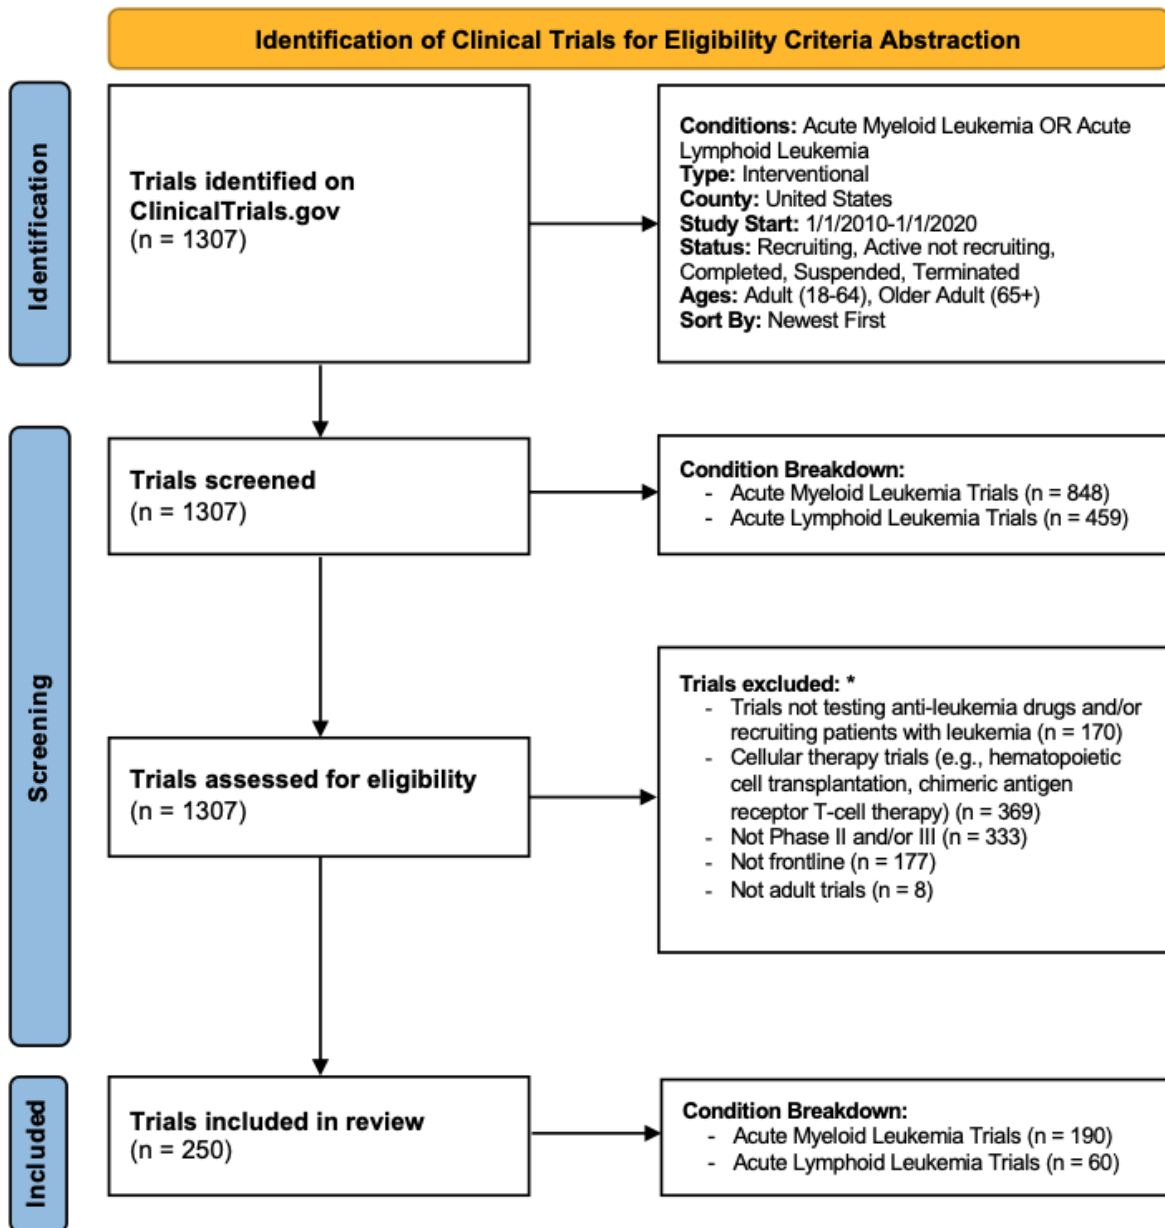

\*Trials were reviewed for the listed exclusions in order from top to bottom; trials may have had more than one reason for exclusion but are categorized based on the first exclusion category listed.

**Supplemental Figure 2.** Violin Plots of Variability for Measures Associated with Enrollment Criteria. All x-axes represent density.

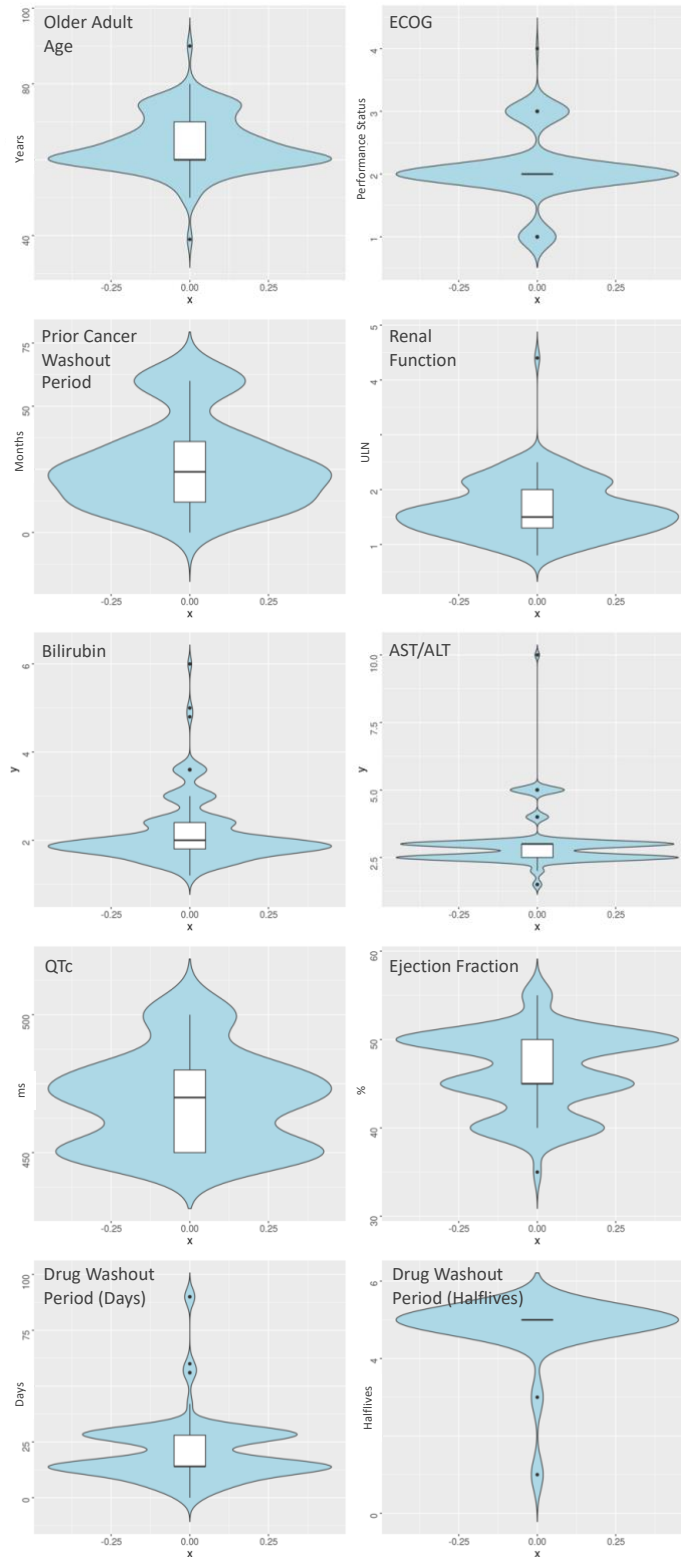

ECOG: Eastern Cooperative Oncology Group; WBC: white blood count; L: liters; ULN: upper limit of normal; AST/ALT: aspartate transaminase / alanine aminotransferase; QTc: corrected QT interval; %: percentage

**Supplemental Figure 3.** Concordance and discordance of eligibility criteria with drug safety signals by trial phase.

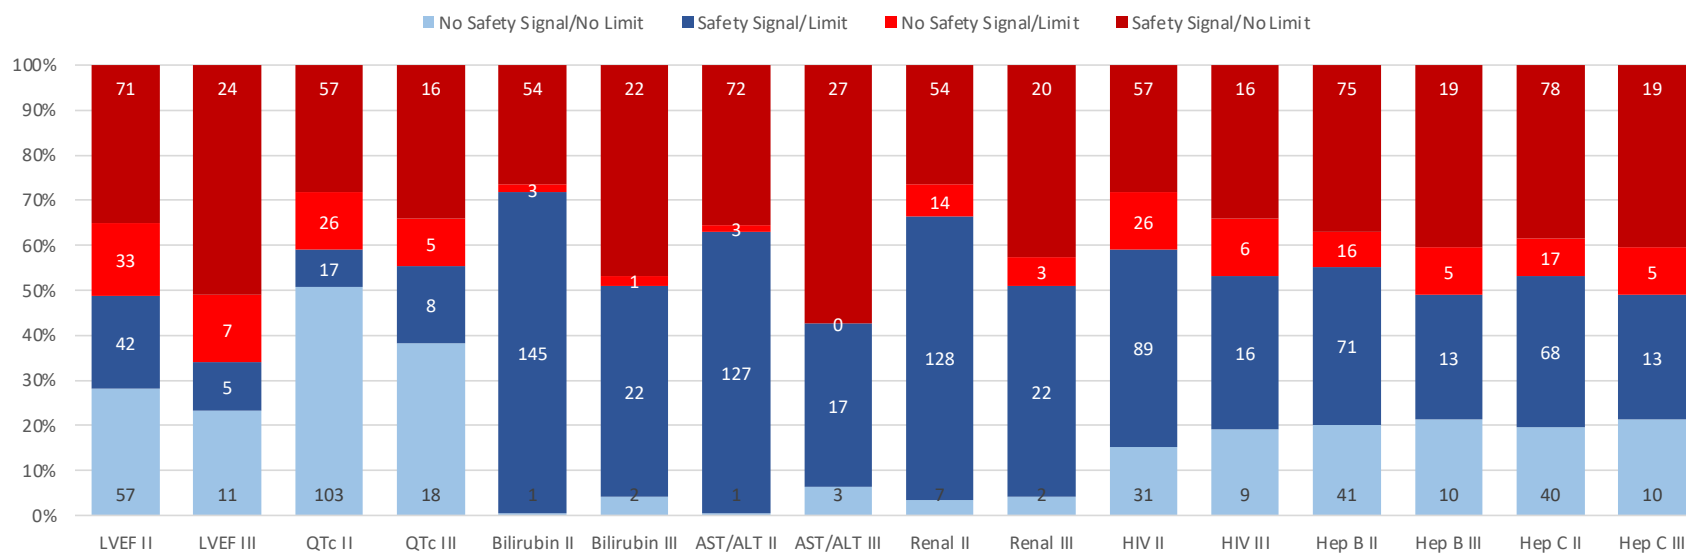

Stacked bars show concordance (blue) and discordance (red) of criteria with drug safety signals. For criteria with associated measures, box and whisker plots show median and interquartile ranges based on the presence (red) or absence (blue) of a drug safety signal; outlier points are shown individually. The label “II” refers to phase II trials and “III” to phase III trials.

LVEF: left ventricular ejection fraction; QTc: corrected QT interval; AST/ALT: aspartate transaminase / alanine aminotransferase;

HIV: human immunodeficiency virus; Hep: hepatitis

**Supplemental Figure 4.** Differences between renal and hepatic function limits suggested by drug safety profiles and enrollment criteria stratified by trial phase.

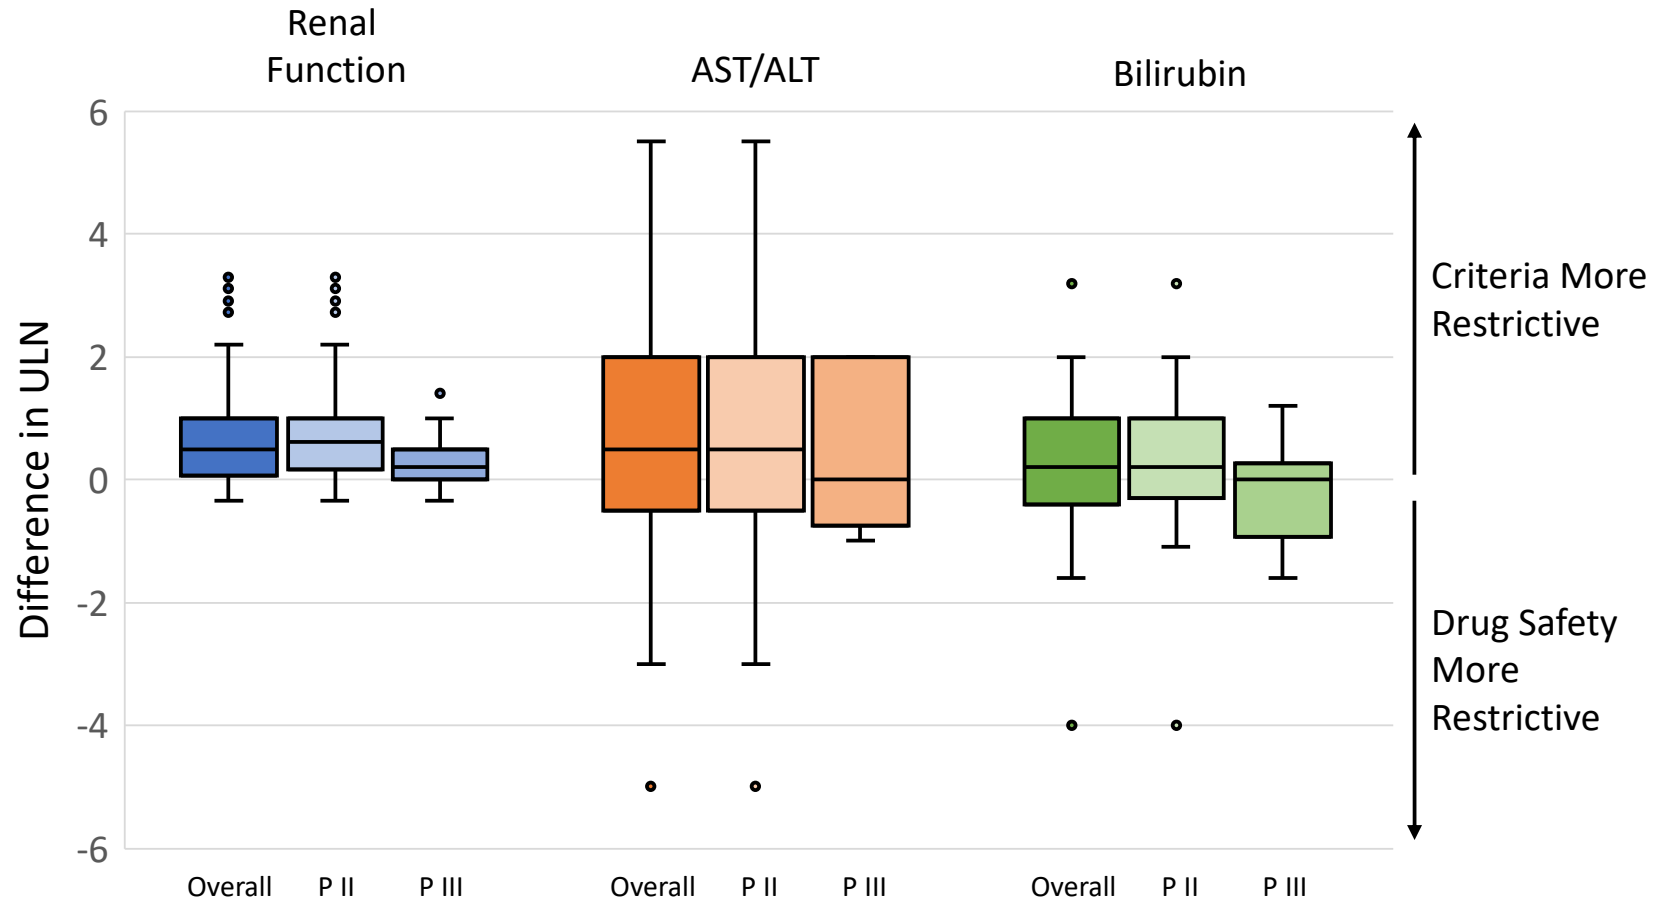

Each box plot shows the difference between the limits suggested by the most conservative safety profile suggested by the drug review and by the trial's enrollment criteria. Positive criteria indicate the trial criteria is more restrictive than the drug safety profile.



AST/ALT: aspartate transaminase / alanine aminotransferase; ULN: upper limit of normal; P II: phase II; P III: phase III
